# Supplementary material
Source: publisher figshare collection journal article supplement (https://gsapubs.figshare.com/ndownloader/files/25687937)
Supplement: Supplementary file 1 [file 25687937]

Cheng, W., et al., 2021, An ~1100 yr record of human and seabird occupation in the High Arctic inferred from pond sediments: Geology, v. 49, https://doi.org/10.1130/G48215.1

| TABLE S1. RADIOCARBON RESULTS OF SEDIMENT CORES | | | | | | | | |
| --- | --- | --- | --- | --- | --- | --- | --- | --- |
| Core | Middle depth (cm) | Sample size (mgC) | δ14C  (‰) | Raw 14C age (yr B.P.) | Calibrated age (yr B.P.) | Macrofossil type | Calibrated  age (CE) | Species |
| CV13 | 3.25 | 0.16 | 86.5 ± 2.0 | –660 ± 15 | Modern | Mix | Modern | *Daphnia* ephippia |
|  | 8.75 | 0.019 | –92.8 ± 15.1 | 780 ± 140 | 454 ± 199 | Mix | 1496 ± 199 | *Daphnia*, larvae midge, moss |
| CV9 | 4.25 | 0.12 | –49.7 ± 2.2 | 410 ± 20 | 9 ± 14 | Mix | 1941 ± 14 | Trace amounts of organic matter |
|  | 12.25 | 0.085 | –142.2 ± 3.4 | 1230 ± 35 | 734 ± 59 | Mix | 1216 ± 59 | Trace amounts of organic matter |
|  | 14.25 | 0.077 | –146.1 ± 3.8 | 1270 ± 40 | 765 ± 68 | Mix | 1185 ± 68 | Trace amounts of organic matter, plant tissue, midge |
| CV30 | 2.25 | 0.027 | 132.9 ± 12.8 | –990 ± 100 | Modern | Terrestrial | Modern | *Saxifraga oppositifolia* |
|  | 10.25 | 0.040 | –21.5 ± 7.7 | 170 ± 70 | 153 ± 157 | Terrestrial | 1797 ± 157 | *Saxifraga oppositifolia* |
|  | 22.0 | 0.069 | –146.8 ± 3.9 | 1275 ± 40 | 778 ± 57 | Mix | 1172 ± 57 | *Saxifraga oppositifolia*,  *Papaver* sp., *Silene uralensis* |

*Note*: Ages were obtained from macrofossils isolated from sediment core sections. Raw ages were calibrated with the calibration curve IntCal13. “Modern” in the calibrated age column refers to a sample from >1950 (in the era of nuclear weapons testing). “Mix” in the macrofossil type column refers to a mix of terrestrial and aquatic macrofossils. A mix of both macrofossils was used for dating unless the terrestrial ones were enough for analysis. Ages from mixed macrofossils were corrected with a reservoir age of 400 yr. See the Supplemental Material (see text footnote 1) for a detailed chronology.
